# Supplementary material for: Giving back
Source: JCI journal article supplement (doi:10.1172/jci77286), 2014-07-01

# Eugene Braunwald M.D.

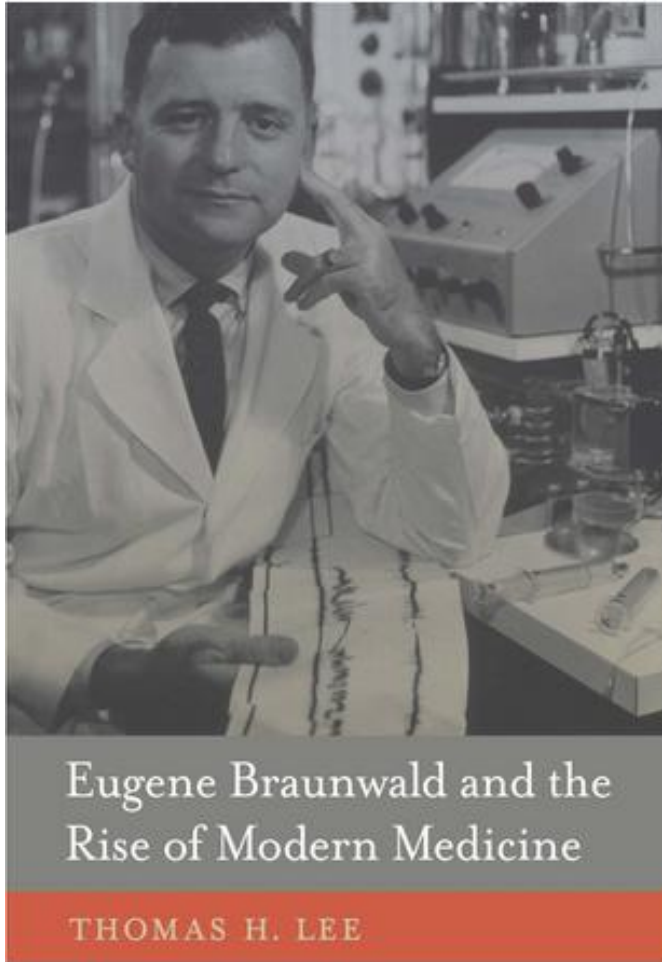

**Eugene Braunwald, MD**  
(1963)  
*Chief of Cardiology*  
*National Heart Institute*

# Brigham and Women's Hospital Chiefs

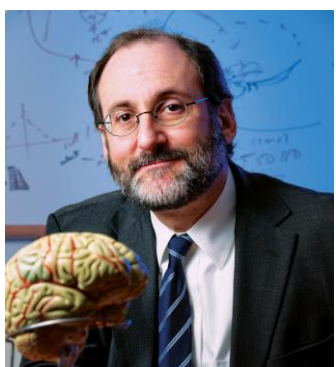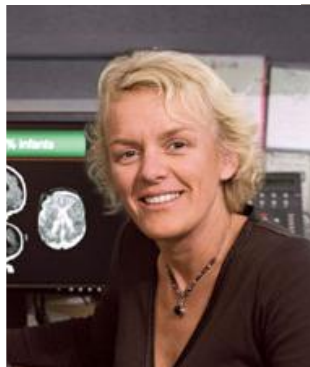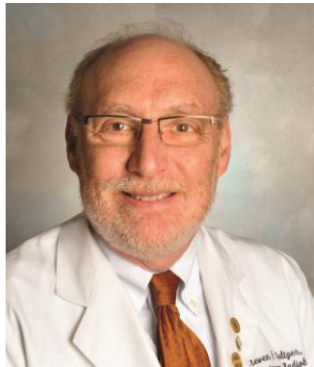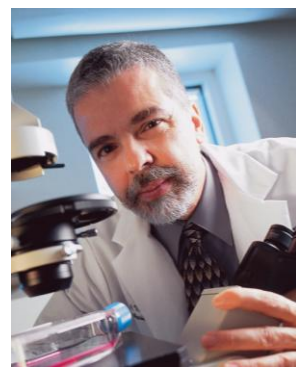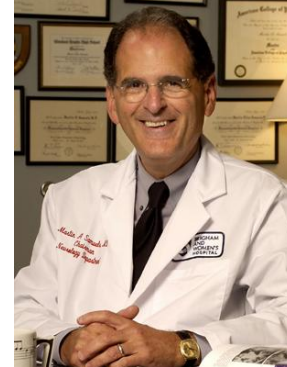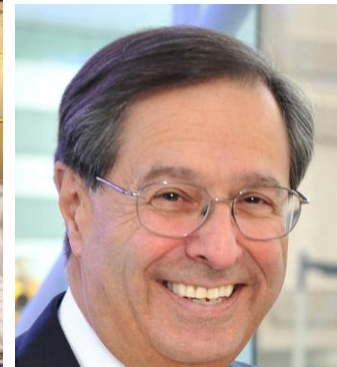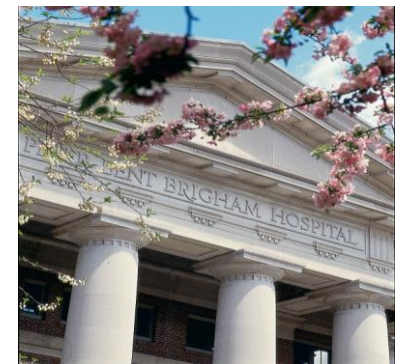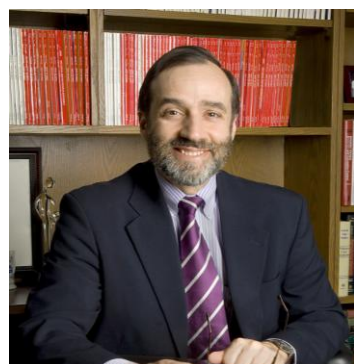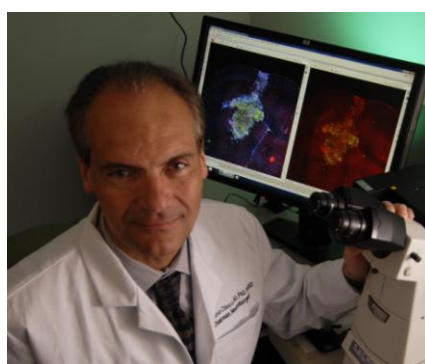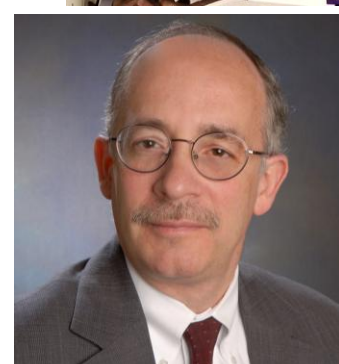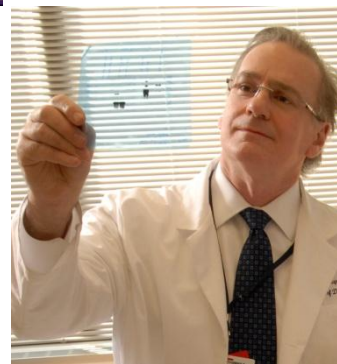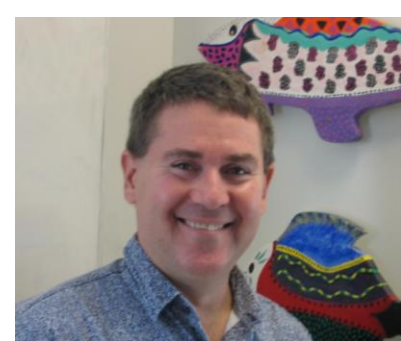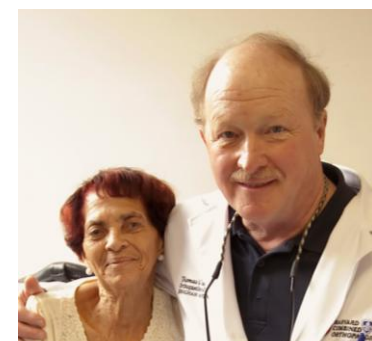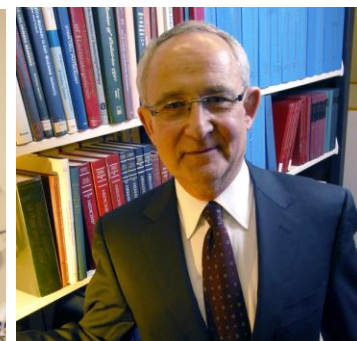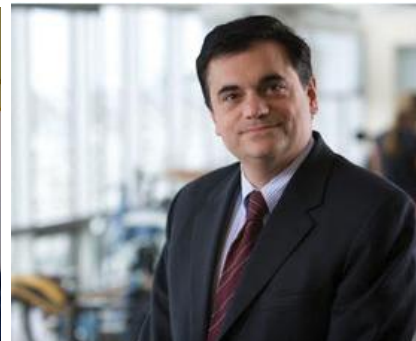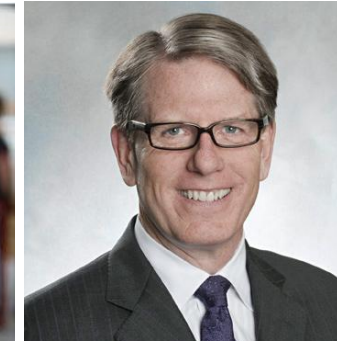

# William N. Kelley M.D.

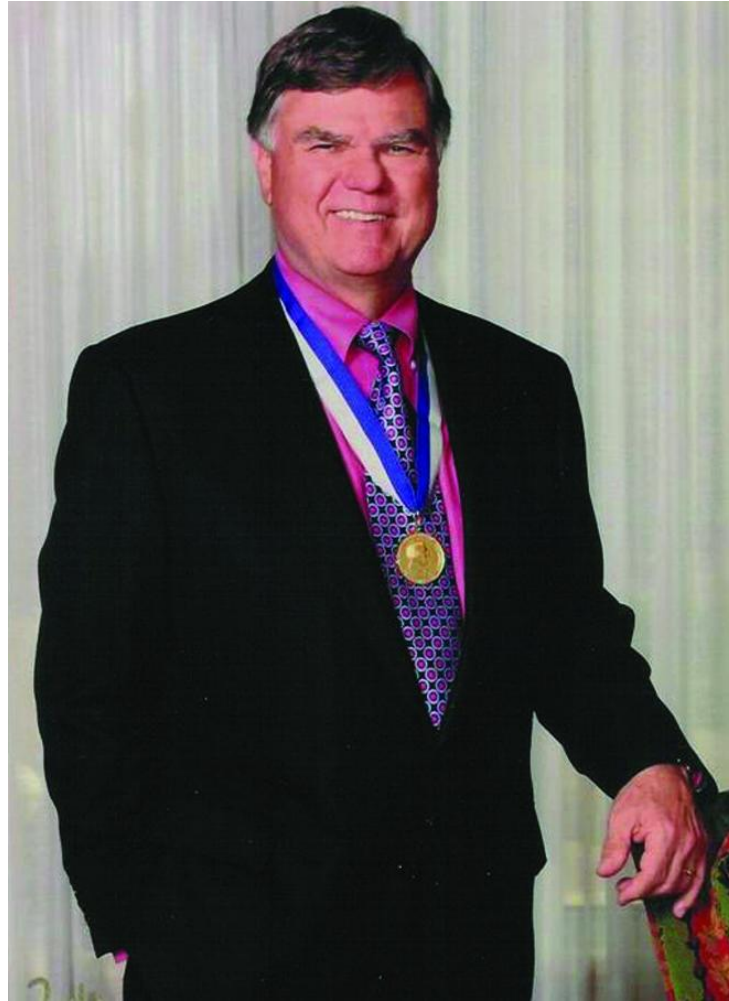

**Dr. Bill Kelley**  
*Kober Recipient 2005*

# Sam Berns

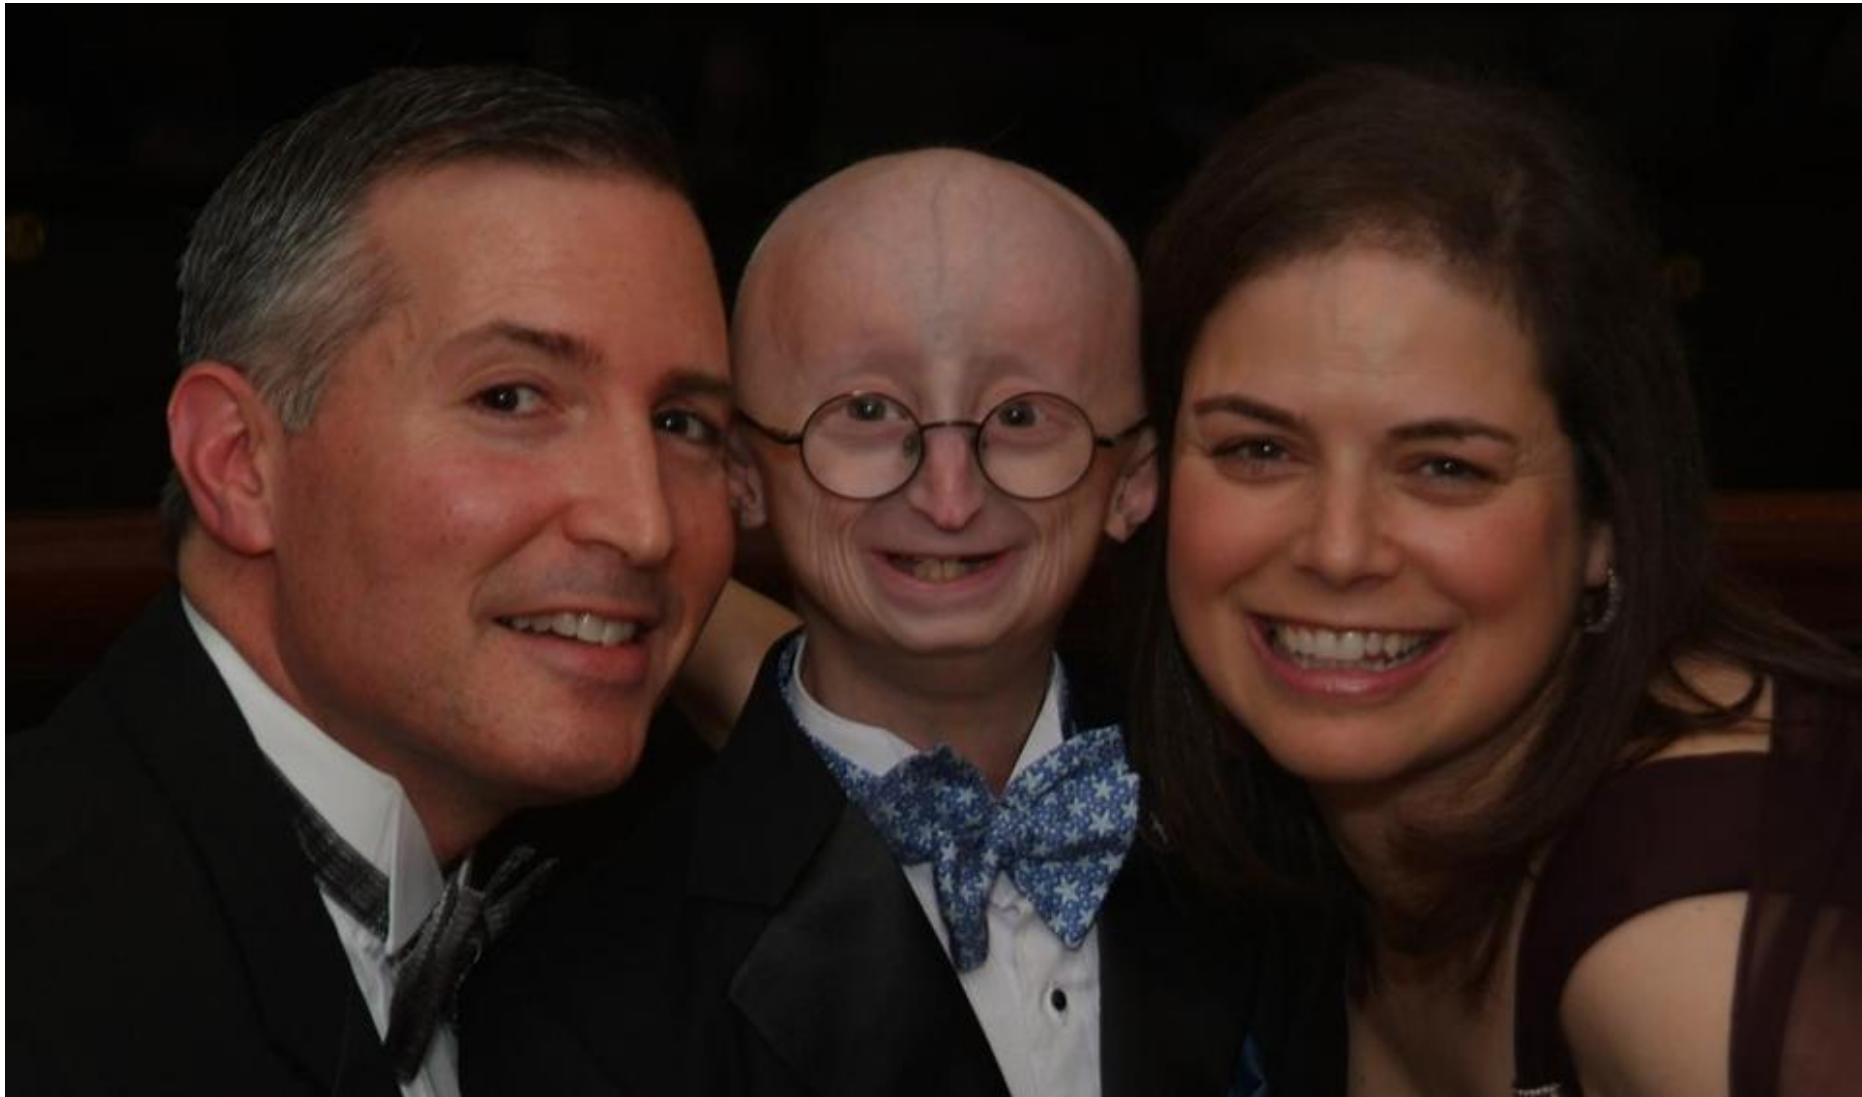

# NIH Colleagues

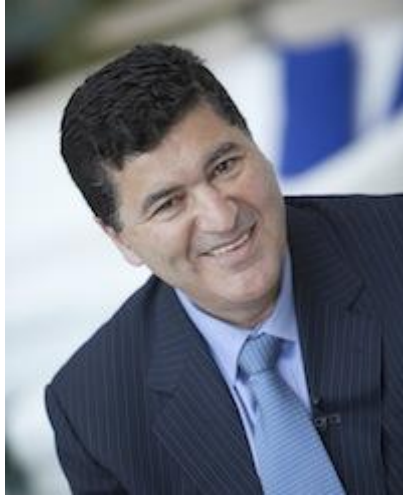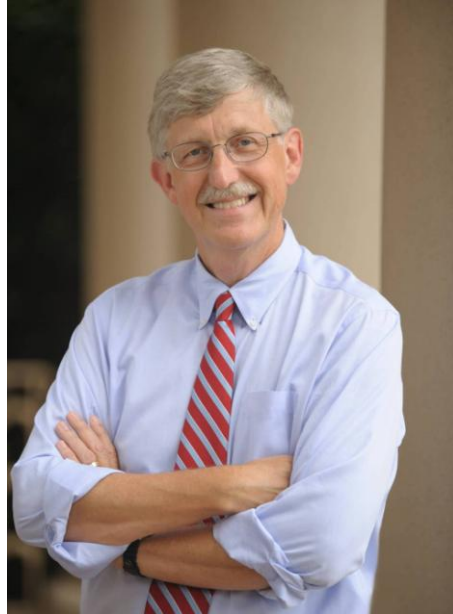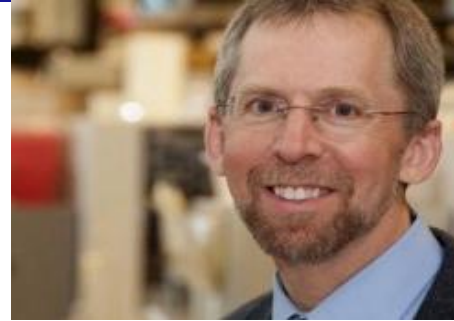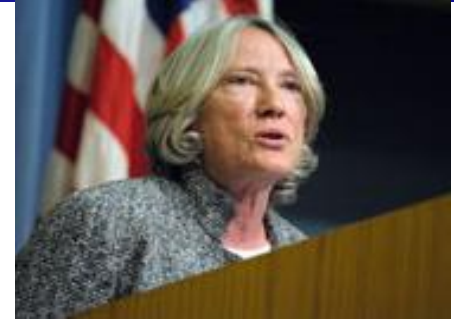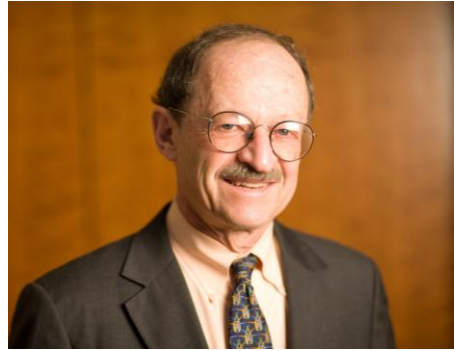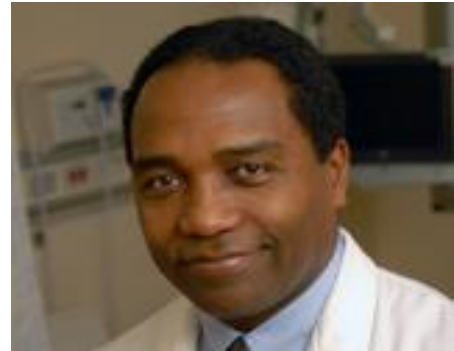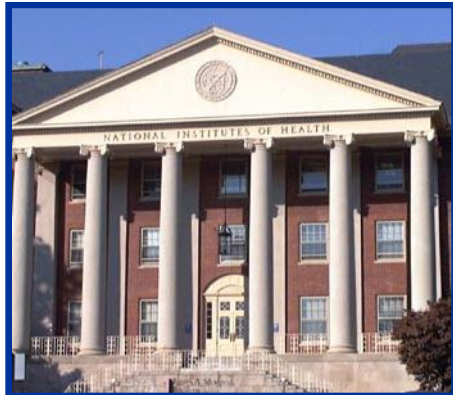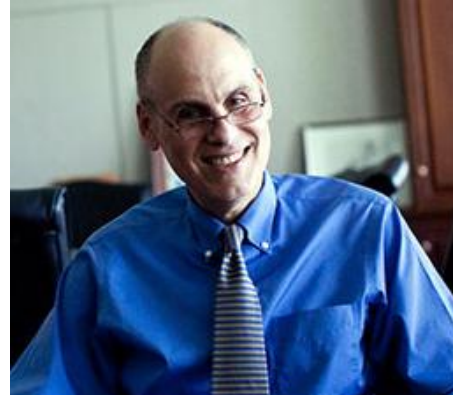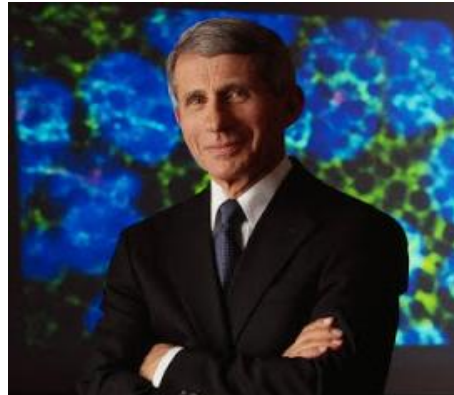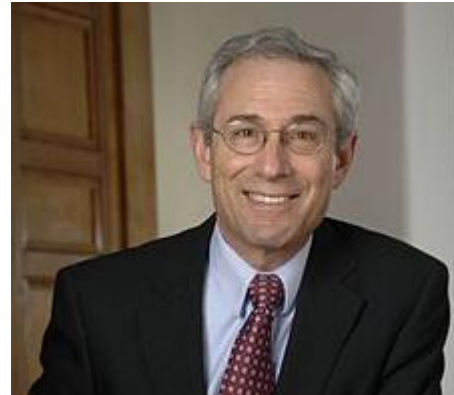

# Helen Taussig M.D. & Helen Ranney M.D.

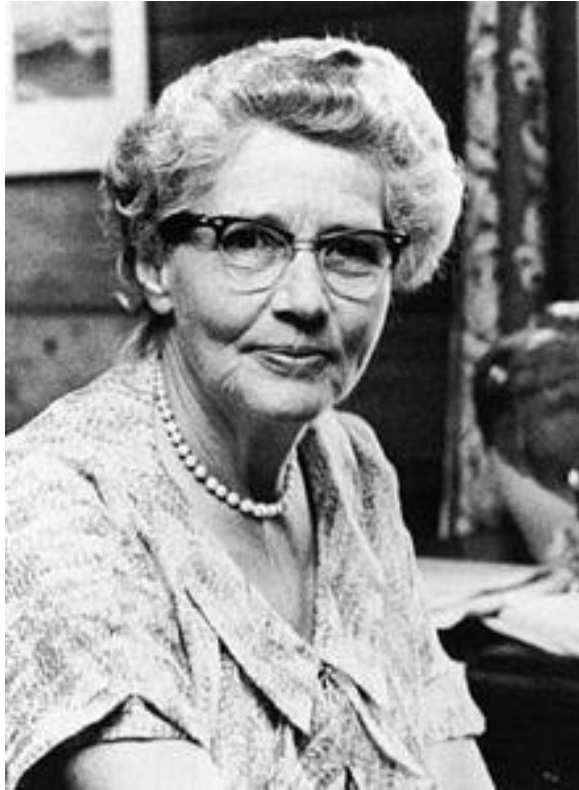

**Helen B. Taussig, MD**  
(1898 – 1986)  
*Kober Recipient 1987*

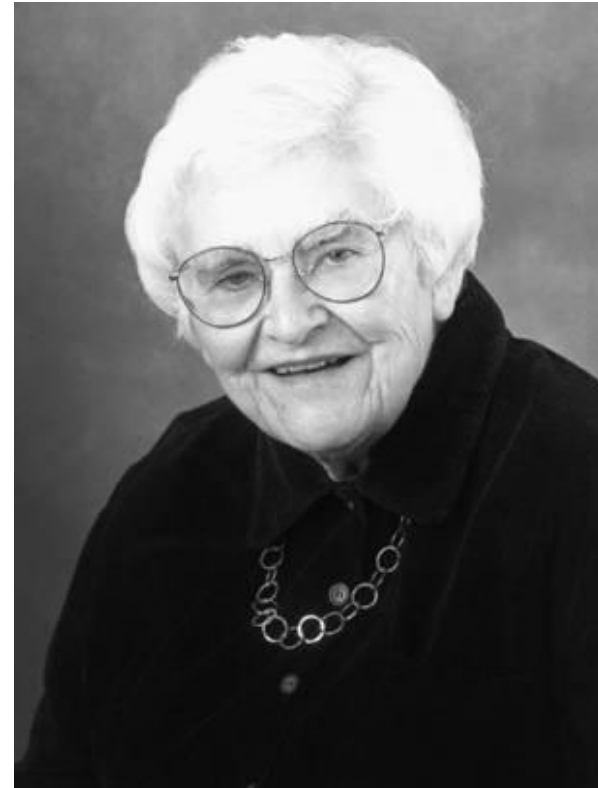

**Helen M. Ranney, MD**  
(1920-2010)  
*Kober Recipient 1997*

# My Family

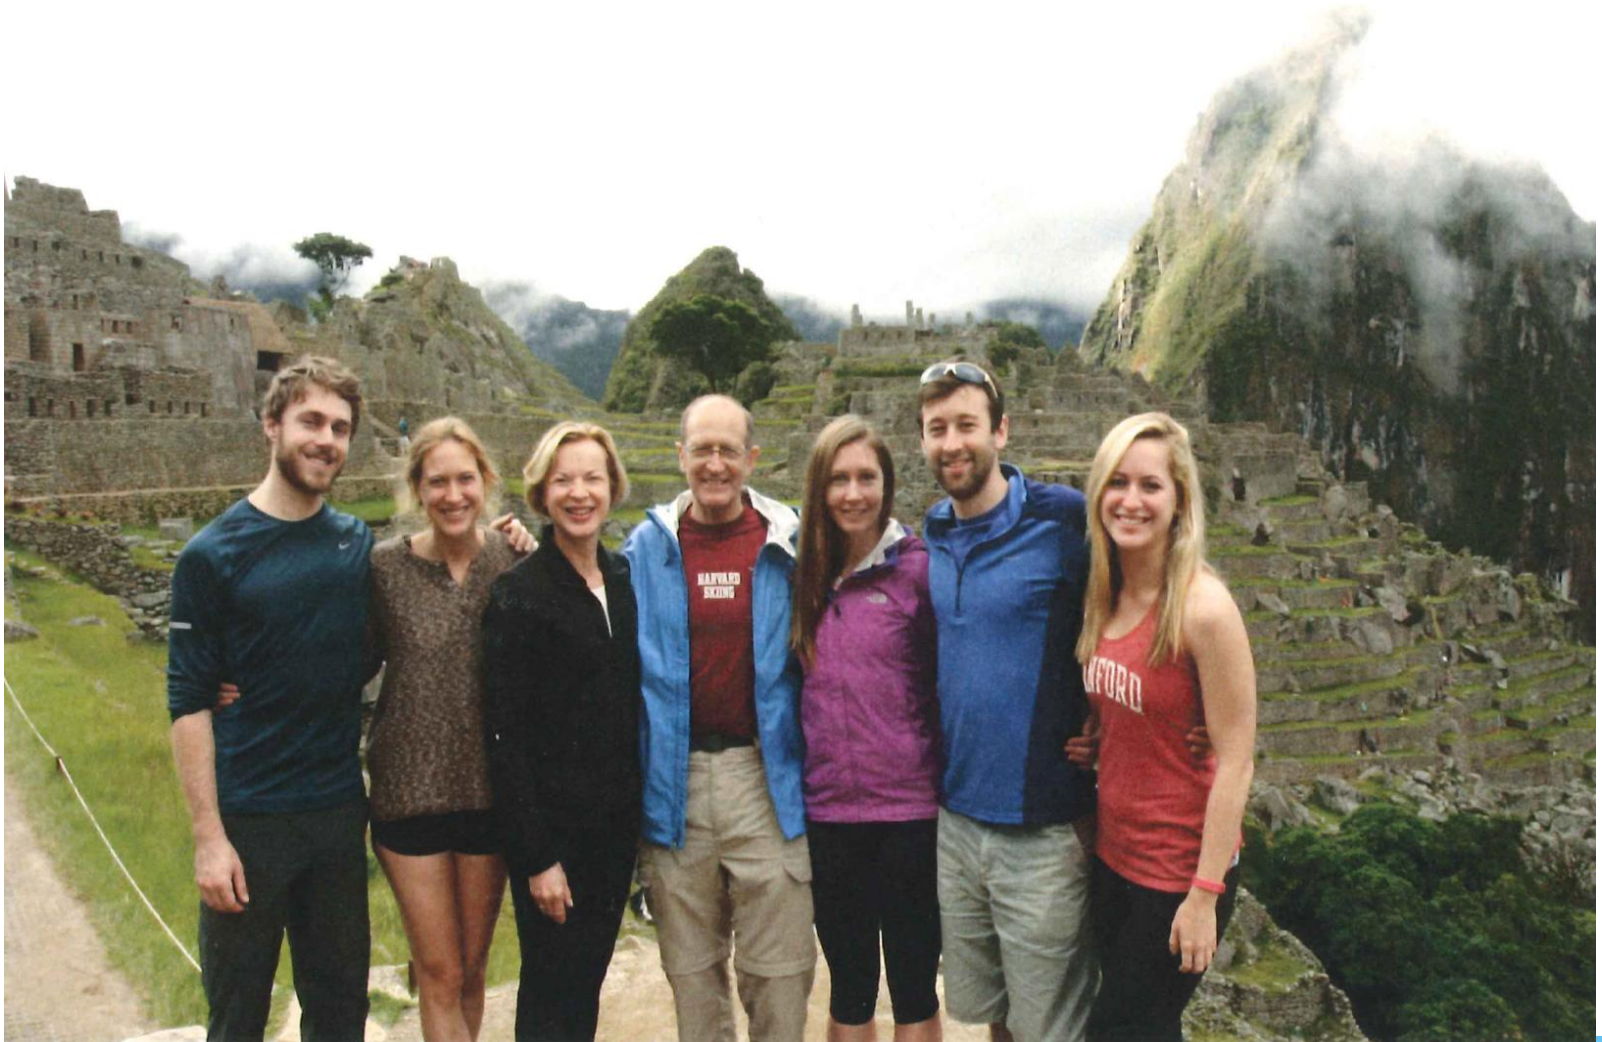

Supplement: sd1 [file 1]
